# Supplementary material
Source: Research Square preprint supplement (doi:10.21203/rs.3.rs-9436195/v1)
Supplement: Supplementary file 1 [file 02f82732219688a6d38fdaa6.docx]

| 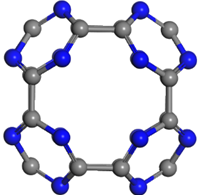  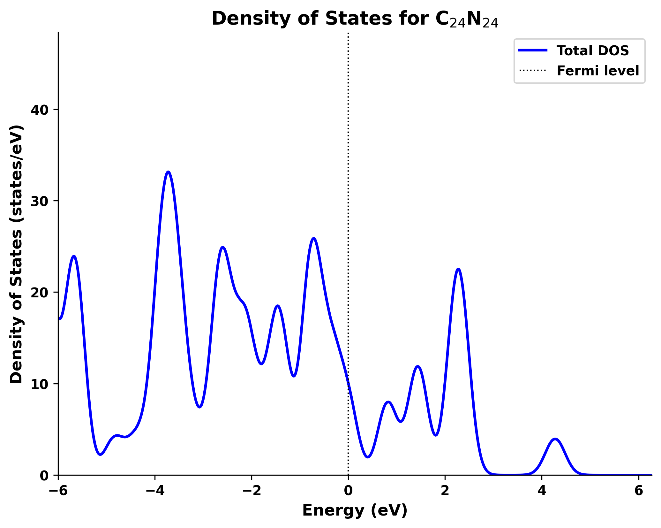   1. DOS of bare C24N24 | 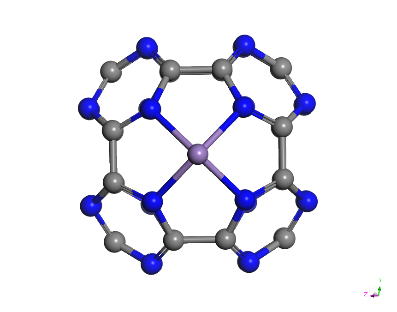  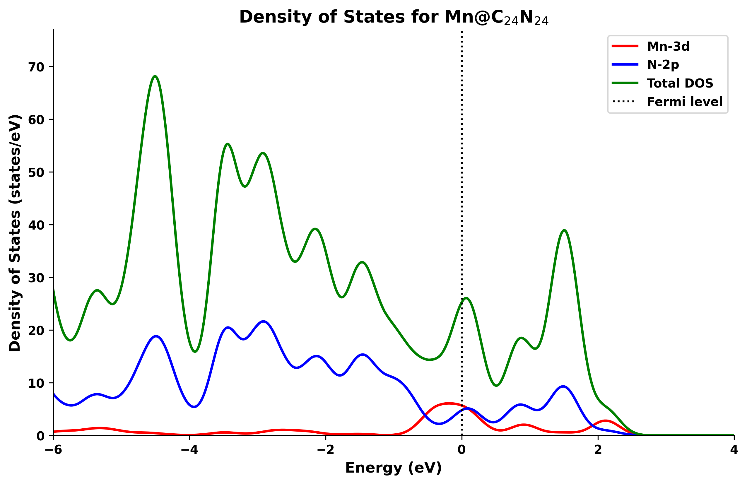   1. PDOS of Mn@C24N24 |
| --- | --- |
| 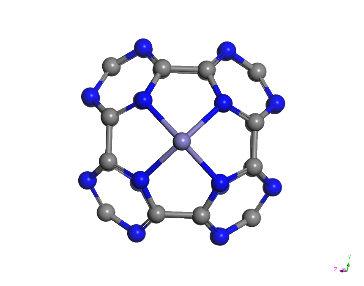  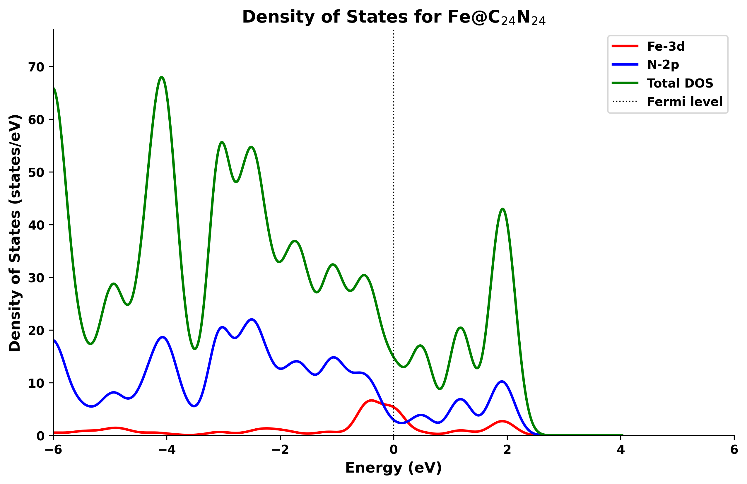   1. PDOS of Fe@C24N24 | 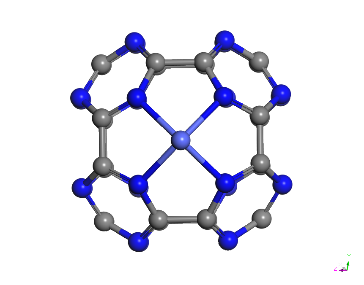  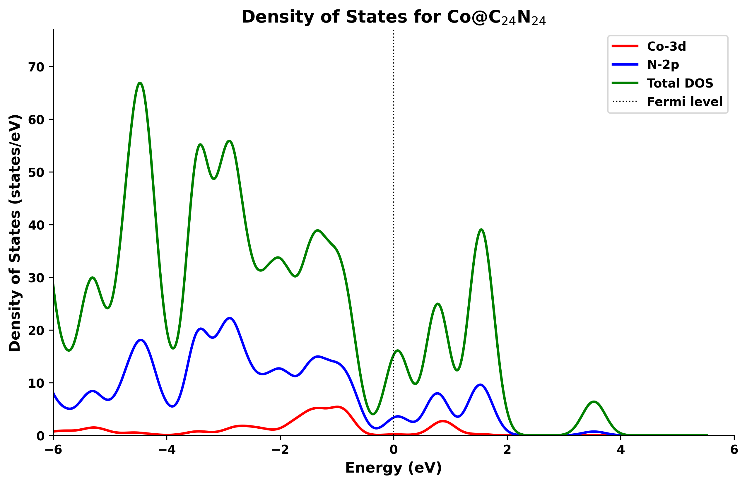   1. PDOS of Co@C24N24 |
| 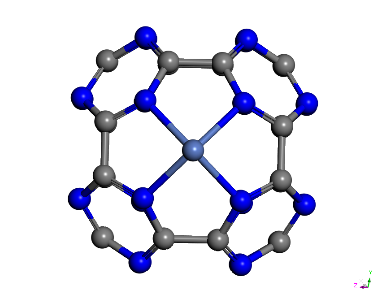  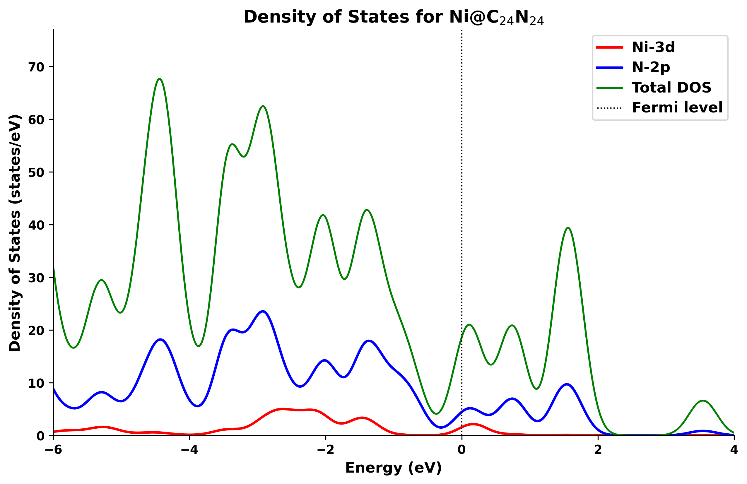   1. PDOS of Ni@C24N24 | 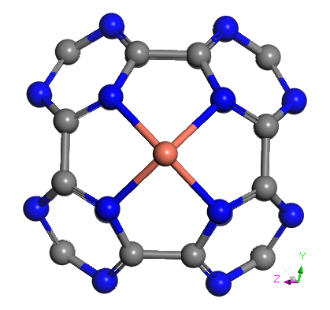  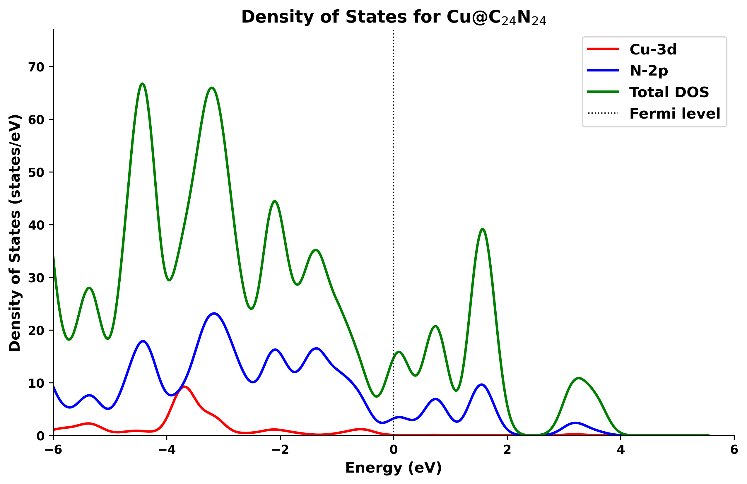   1. PDOS of Cu@C24N24 |
| 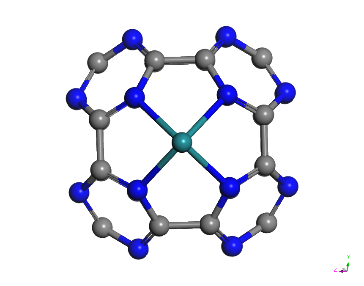  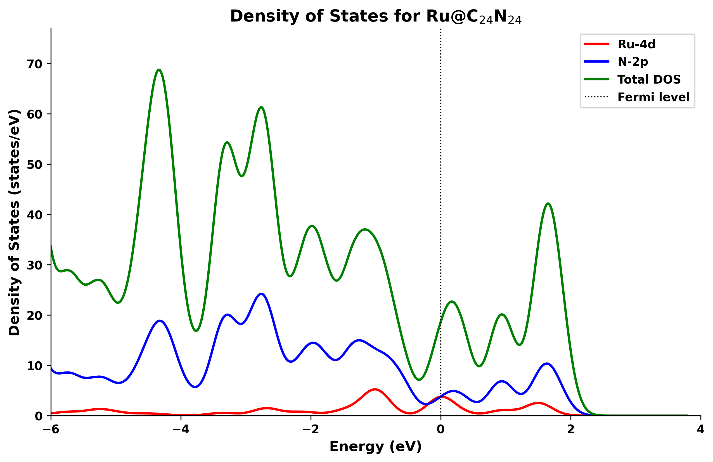   1. PDOS of Ru@C24N24 | 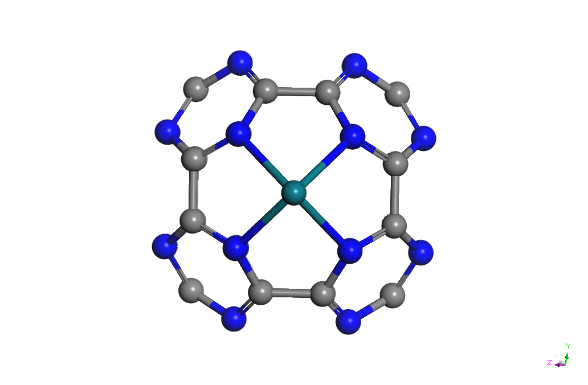  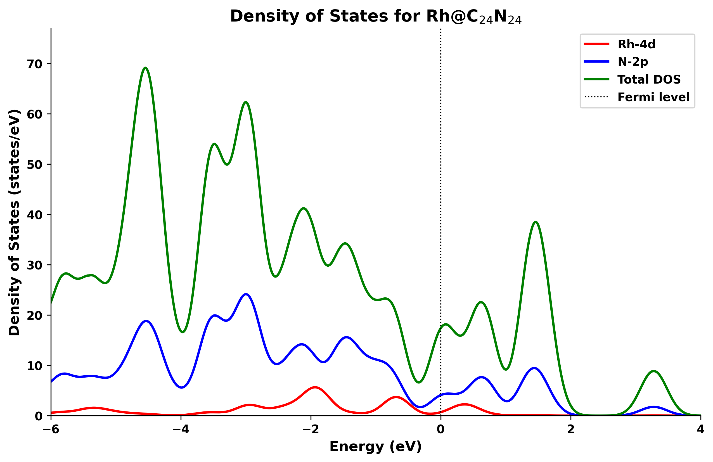   1. PDOS of Rh@C24N24 |
| 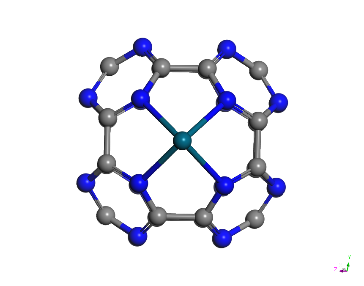  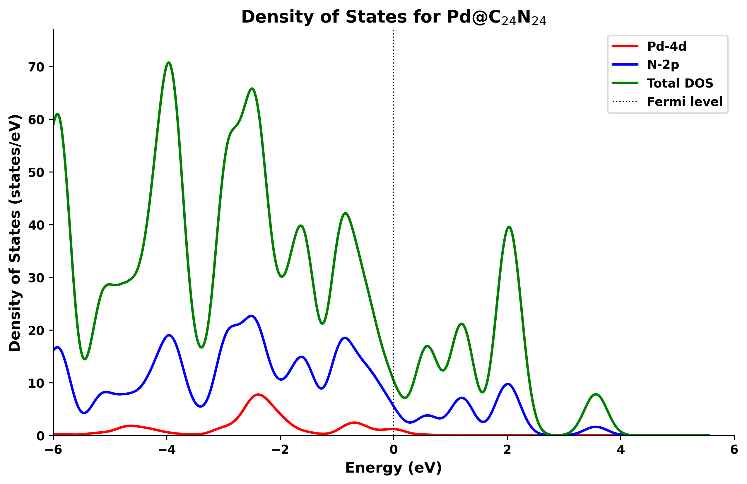   1. PDOS of Pd@C24N24 |  |

**Figure 4 Supporting Information**: The density of state of bare C24N24 and TM@C24N24 systems.

**IBO Analysis**:

1. Mn@C24N24

| 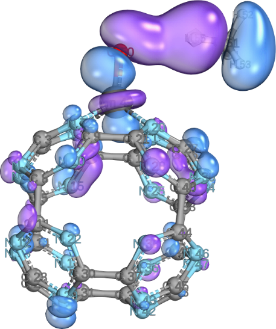  1 | 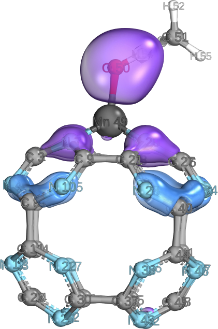  2 | 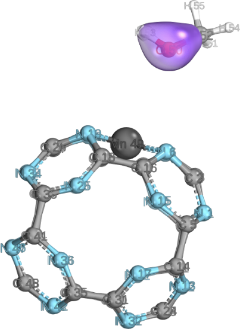  3 |
| --- | --- | --- |
|  |  |  |
|  |  |  |
| 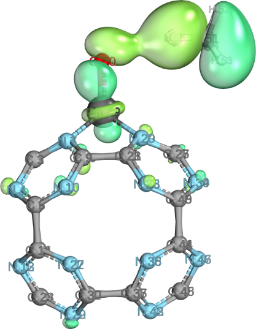  1 | 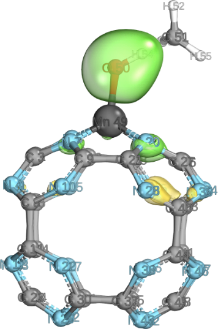  2 | 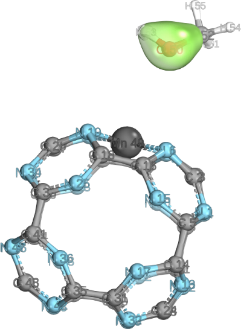  3 |

(b) Fe@C24N24

| 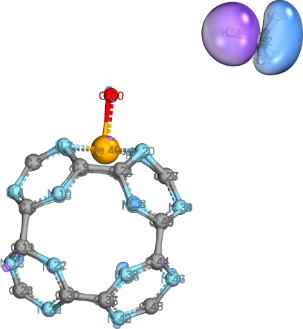  1 |  |  |
| --- | --- | --- |
|  | 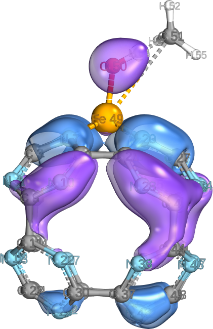  2 | 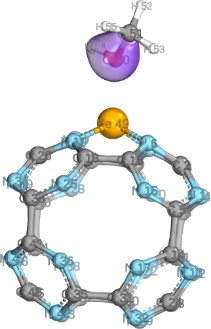  3 |
| 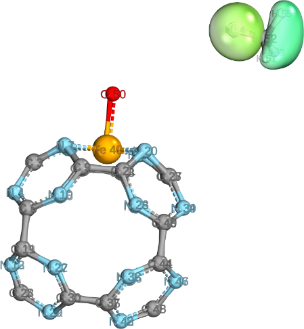  1 |  |  |
|  |  |  |
|  |  |  |

(c) Co@C24N24

| 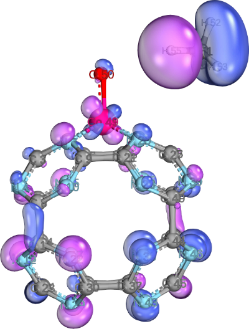  1 | 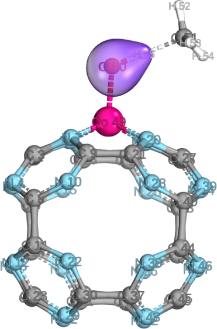  2 | 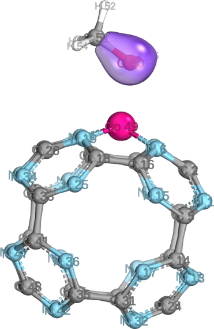  3 |
| --- | --- | --- |
|  |  |  |
| 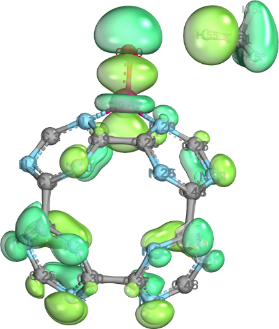  1 | 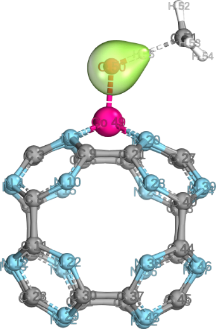  2 | 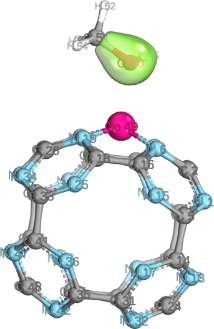  3 |
|  |  |  |

1. Ni@C24N24

| 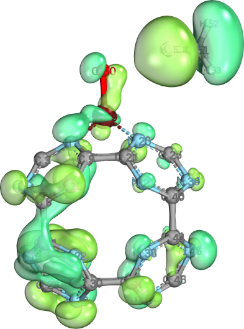  1 | 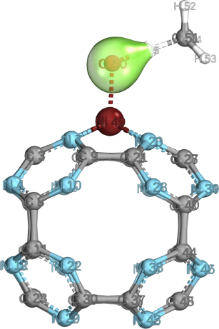  2 | 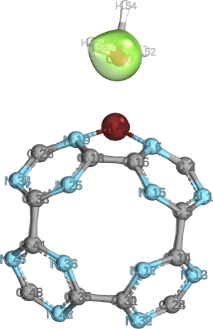  3 |
| --- | --- | --- |
|  |  |  |

1. Cu@C24N24


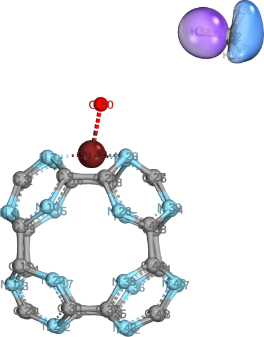

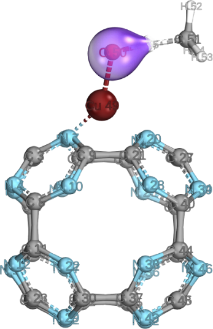

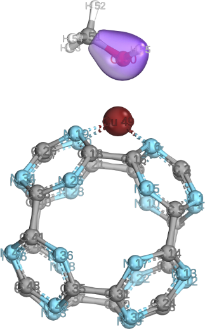


1

3

2

|  |  |  |
| --- | --- | --- |
| 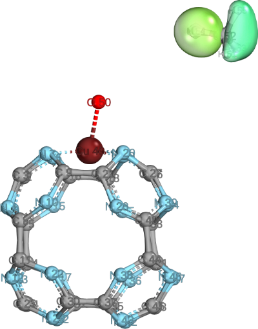  1 | 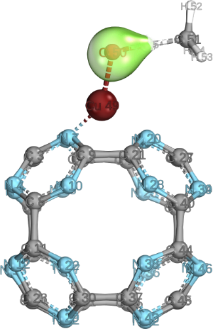  2 | 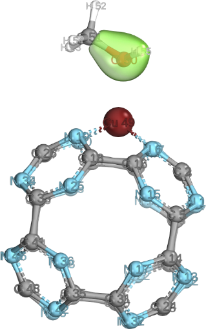  3 |
|  |  |  |
|  |  |  |

(f) Ru@C24N24

|  |  |  |
| --- | --- | --- |
| 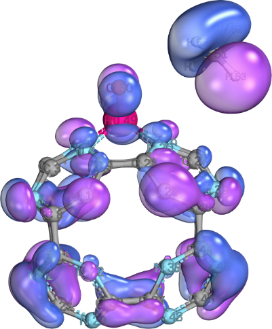  1 | 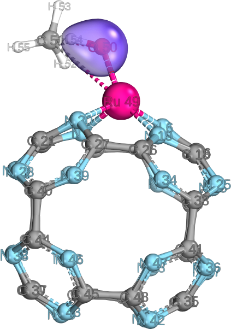  2 | 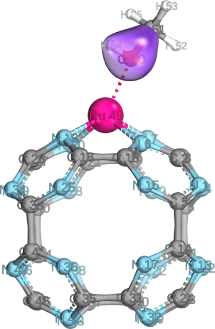  3 |
| 1. Rh@C24N24   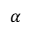  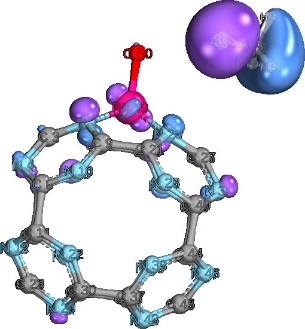  1 | 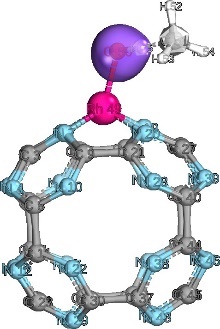  2 | 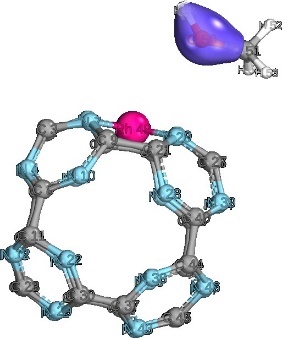  3 |
| 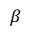  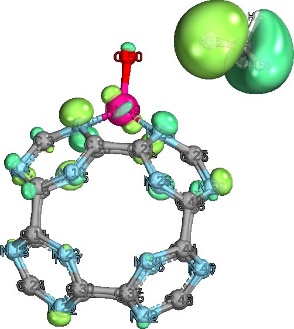  (h) Pd@C24N24  1 | 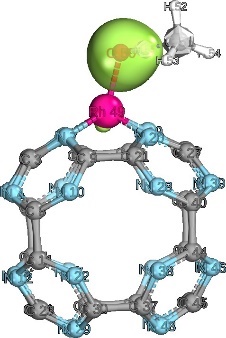  2 | 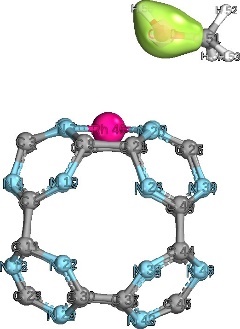  3 |
| 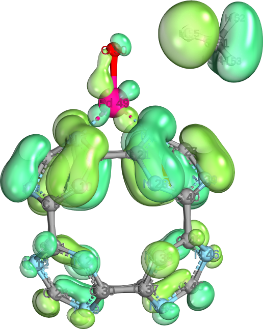  1 | 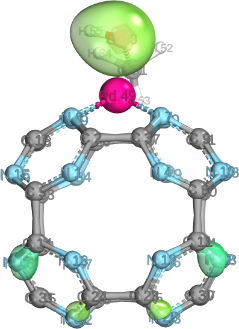  2 | 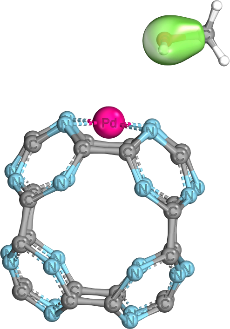  3 |

**Figure 9 Supporting Information**: The Intrinsic Bonding Orbital of the eight TM@C24N24 systems.
